# Supplementary material for: YOD1 Serves as a Potential Prognostic Biomarker For Pancreatic Cancer
Source: Research Square preprint supplement (doi:10.21203/rs.3.rs-877887/v1), 2021-10-01
Supplement: Supplementary file 1 [file 22ee4890f3a89bb48d0cf30f.docx]

Table.S1 6 patients clinical information

| Number | Gender | Age | Pathology | Tumor size (mm) | Lymph Node Metastasis | Distant Metastasis | Stage |
| --- | --- | --- | --- | --- | --- | --- | --- |
| 1 | Male | 71 | PASC | 5*4.1 | No | Yes | T3N0M1 |
| 2 | Male | 62 | PAAD | 2.6*1.8 | No | No | T2N0M0 |
| 3 | Female | 73 | PAAD | 2.6*2.1 | No | No | T2N0M0 |
| 4 | Female | 67 | PMN | 2.9*2.6 | Yes | No | T2N1M0 |
| 5 | Male | 66 | PAAD | 1.8*1.7 | No | No | T1N0M0 |
| 6 | Female | 64 | PAAD | 2.0*1.6 | No | No | T2N0M0 |

PASC, pancreatic adenosquamous carcinoma; PAAD, pancreatic adenocarcinoma; PMN, pancreatic mucinous neoplasm; T, tumor; N, node; M, metastasis
